# Supplementary material for: Micropatterned, clickable culture substrates enable in situ spatiotemporal control of human PSC-derived neural tissue morphology
Source: PubMed Central journal article supplement (PMC4456773; doi:10.1039/c4cc08665a), 2015-02-17
Supplement: CC-051-C4CC08665A-s001.pdf [file CC-051-C4CC08665A-s001.pdf]

# **Micropatterned, clickable culture substrates enable *in situ* spatiotemporal control of human PSC-derived neural tissue morphology**

G. T. Knight, J. Sha, and R. S. Ashton

## **Supplemental Information:**

Supplemental Figure 1: relevant to Figure 2 and 3

Supplemental Figure 2: relevant to Figure 1

Supplemental Figure 3: relevant to Figure 1

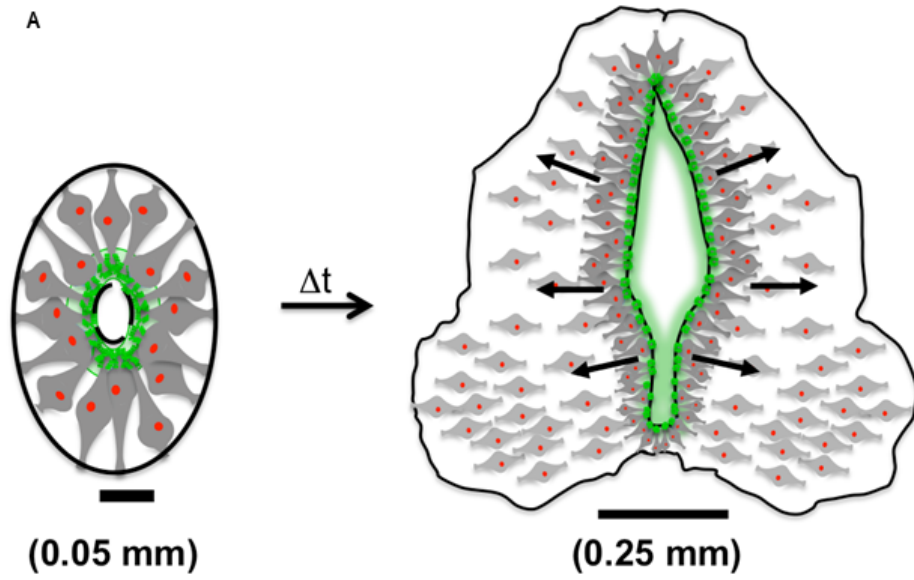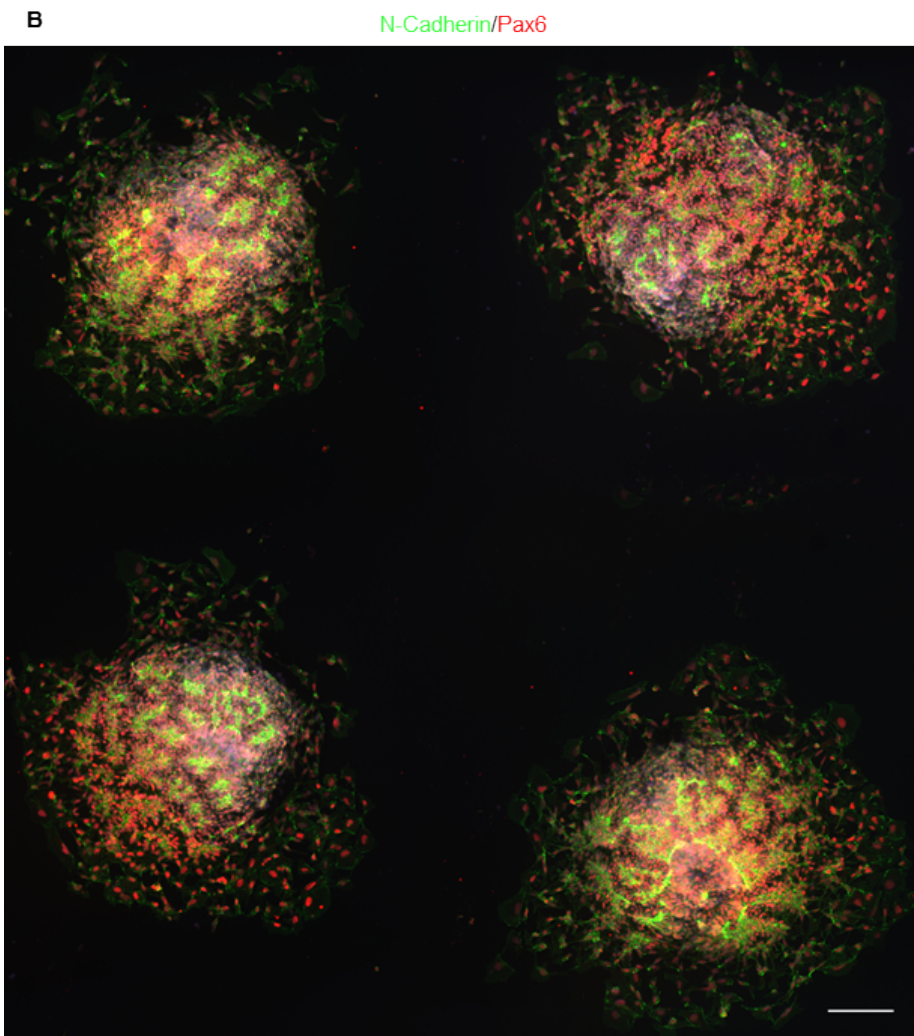

**Supplemental Figure 1:** **A)** Schematic of neural tube morphogenesis in early human development depicted as transverse slices. **B)** Fluorescent images of neural tissues with polarized NSC cores and radially expanding morphologies due to outgrowth of progeny at 24 hours post-click functionalization, 250  $\mu\text{m}$  scale bars.

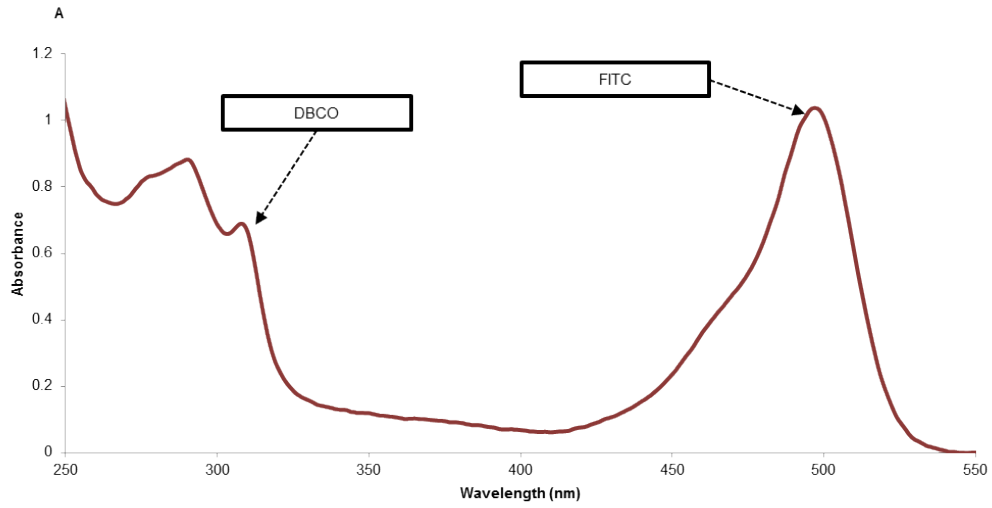

**Supplemental Figure 2: A)** UV-Vis spectra of FITC-RGD-DBCO with characteristic peaks at ~309 nm and ~492 nm denoting the presence of DBCO and FITC molecules, respectively.

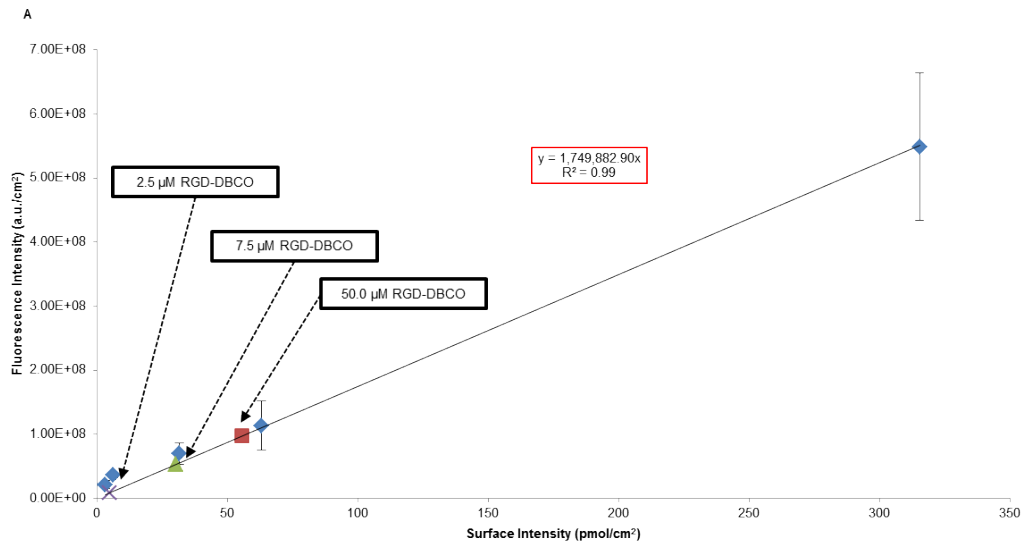

**Supplemental Figure 3: A)** Standard curve of FITC-RGD-DBCO with data points corresponding to concentrations of immobilized RGD-DBCO on functionalized PEGMA substrates.
